# Supplementary material for: Novel Genetic Variations in Acute Myeloid Leukemia in Pakistani Population
Source: Front Genet. 2020 Jun 23;11:560. doi: 10.3389/fgene.2020.00560 (PMC7324646; doi:10.3389/fgene.2020.00560)
Supplement: TABLE S1 — Clinical features of 26 AML cases. [file Table_1.XLSX]

## Sheet: Sheet1
Supplementary Table 1: Clinical features of 26 AML cases
S.No	Lab ID	Gender	Age (years) at time of sample collection	Registration Date	Chromosomal abnormalities	Blasts% (circulating)	Clinical Presentation	Clinical Outcomes
1	AML01	M	48	10-06-2016	N/Available	53	High grade fever.	EXPIRED
2	AML02	M	15	18-07-2016	46,XY, +mar, add(9q34.3), del(11q23)(07)/47; XY, add(9q34.3)(13)	30	High grade fever, hepatospleenomegaly	EXPIRED
3	AML03	M	58	20-06-2016	N/Available	90	Weakness, high grade fever, Body ache	LOST TO FOLLOW
4	AML04	M	22	18-06-2016	Normal Karyotype	18	Weakness and fever.	EXPIRED
5	AML05	F	13	07-06-2016	t(3;5)(q25; q31)(20)	18	Weakness and fever.	EXPIRED
6	AML06	M	47	21-09-2016	Normal Karyotype	22	Known case of CML transformed to AML	-
7	AML07	F	35	10-09-2016	Normal Karyotype	28.2	High grade fever , Weakness	EXPIRED
8	AML08	F	26	21-12-2016	N/Available	70	High grade fever, gum bleeding	EXPIRED
9	AML09	M	51	15-06-2017	46˜90hypaploidy (15)	58	Weakness and high grade fever.	EXPIRED
10	AML10	M	17	10-10-2016	N/Available	59	Fever	EXPIRED
11	AML11	F	45	13-09-2017	Normal Karyotype	2	Fever, bleeding ,Spleenomegaly, occasional throat pain and oral ulcer.	EXPIRED
12	AML12	F	18	12-01-2018	Normal Karyotype	90	High fever, with spleenomegaly	EXPIRED
13	AML13	M	15	15-01-2018	46, XY(15) Normal Karyotype	59	Fever, body ache, bruises.	EXPIRED POST CHEMO
14	AML14	F	28	06-01-2018	46, XX dek(20)(08)/ 46, XX (07)	54	Fever, body pain , weakness.	DISEASE RELAPSED
15	AML15	F	32	26-12-2017	46, XX(15) Normal Karyotype	29	PV bleeding, headache and weakness	ALIVE with disease relapsed.
16	AML16	F	46	19-04-2017	Normal Karyotype	35	Fever and weakness	EXPIRED POST CHEMO
17	AML17	F	15	23-12-2017	t(8:21) Inv 16 Neg	30	Fever, body ache,bleeding and spleenomegaly	REFRACTORY DISEASE
18	AML18	M	20	30-12-2017	46, XY(20) Normal	25	Fever and weakness	EXPIRED
19	AML19	F	29	17-01-2018	Culture failure	90	High grade fever , weakness, GI bloating	EXPIRED
20	AML20	M	20	16-02-2018	45, XY, -8(15)	45	Fever cough, mouth ulcer. Also mentally retarded since childhood	-
21	AML21	M	7	07-03-2018	Normal Karyotype	69	Fever, history of wounds. Bleeding	-
22	AML22	F	29	26-03-2018	Normal Karyotype	88	Fever , diarrhea, bleeding from mouth, spleenomegaly.	ALIVE
23	AML23	M	42	08-03-2018	46,XY (20) Normal	50	high grade fever, cough , nausea	EXPIRED
24	AML24	M	45	20-05-2018	N/Available	84.03	High grade fever.	ALIVE
25	AML25	M	25	23-05-2018	N/Available	45	Fever, spleenomegaly	EXPIRED
26	AML26	F	14	27-05-2018	N/Available	66	Generalized weakness , gum bleeding	REFRACTORY DISEASE
					Average Blasts %	50.28
					Median Blasts %	51.5
