# Supplementary material for: Novel Genetic Variations in Acute Myeloid Leukemia in Pakistani Population
Source: Front Genet. 2020 Jun 23;11:560. doi: 10.3389/fgene.2020.00560 (PMC7324646; doi:10.3389/fgene.2020.00560)
Supplement: TABLE S3 — Germline Mutations in AML. [file Table_3.XLSX]

## Sheet: Sheet1
Supplementary Table S3
Germline Mutations in AML
															Variants Allelic Fraction
Gene	Chrom:Position	rsID	Nucloetide Variation	Variant Class	variant type	Variant Effect	Total transcripts	Affected transcripts	cosmic Recurrence	PhyloP score	ClinVar Significance	ClinVar Disease	Detail of Affected Transcripts	No. of Cases with mutation	AM01	AM02	AM03	AM04	AM05	AM06	AM07	AM08	AM09	AM10	AM11	AM12	AM13	AM14	AM15	AM16	AM17	AM18	AM19	AM20	AM21	AM22	AM23	AM24	AM25	AM26
DNMT3A	chr2:25457242	rs147001633	C>T	nonsynonymous	SNV	p.R693H	6	3	.	7.902	Pathogenic; Likely pathogenic; Likely pathogenic; Pathogenic; Likely pathogenic; Pathogenic; Likely pathogenic	Acute_myeloid_leukemia; Adenocarcinoma_of_lung; Myelodysplastic_syndrome; Acute_myeloid_leukemia; Adenocarcinoma_of_lung; Acute_myeloid_leukemia; Myelodysplastic_syndrome	NM_153759:exon19:c.G2078A:p.R693H; NM_022552:exon23:c.G2645A:p.R882H; NM_175629:exon23:c.G2645A:p.R882H	1	.	.	.	.	.	.	.	.	.	.	0.264	.	.	.	.	.	.	.	.	.	.	.	.	.	.	.
GATA2	chr3:128200733	.	T>G	nonsynonymous	SNV	p.T358P	3	3	nul	7.947	.	.	NM_001145662:exon5:c.A1030C:p.T344P; NM_032638:exon5:c.A1072C:p.T358P; NM_001145661:exon6:c.A1072C:p.T358P	2	0.488	.	0.534	.	.	.	.	.	.	.	.	.	.	.	.	.	.	.	.	.	.	.	.	.	.	.
KIT	chr4:55599321	rs121913507	A>T	nonsynonymous	SNV	p.D812V	2	2	924	9.22	Pathogenic; Pathogenic; Likely pathogenic; Likely pathogenic; Pathogenic	Mast_cell_leukemia; Mastocytosis_with_associated_hematologic_disorder; Mastocytosis; _adult_sporadic; Gastrointestinal_stromal_tumor; Hematologic_neoplasm; Acute_myeloid_leukemia	NM_000222:exon17:c.A2447T:p.D816V; NM_001093772:exon17:c.A2435T:p.D812V	1	.	.	.	.	.	.	.	.	.	0.441	.	.	.	.	.	.	.	.	.	.	.	.	.	.	.	.
TET2	chr4:106197000	rs62621450	A>G	nonsynonymous	SNV	p.H1778R	2	1	nul	4.639	.	.	NM_001127208:exon11:c.A5333G:p.H1778R	1	.	.	.	.	.	.	.	.	.	.	.	.	.	.	.	.	0.494	.	.	.	.	.	.	.	.	.
NPM1	chr5:170837543	rs758959453	C>CTCTG	frameshift	insertion	p.L258fs	7	2	1	.	Pathogenic; Pathogenic; Pathogenic; Pathogenic; Pathogenic	Acute_myeloid_leukemia; Myelodysplastic_syndrome_progressed_to_acute_myeloid_leukemia; Acute_myeloid_leukemia; Acute_myeloid_leukemia; Acute_myeloid_leukemia	NM_199185:exon10:c.772_773insTCTG:p.L258fs; NM_002520:exon11:c.859_860insTCTG:p.L287fs	2	.	0.469	.	.	.	.	.	.	.	.	0.251	.	.	.	.	.	.	.	.	.	.	.	.	.	.	.
CUX1	chr7:101921292	rs118010189	A>C	nonsynonymous	SNV	p.K530Q	7	5	nul	8.693	.	.	NM_001202544:exon17:c.A1588C:p.K530Q; NM_001202545:exon17:c.A1498C:p.K500Q; NM_001202546:exon17:c.A1519C:p.K507Q; NM_001913:exon18:c.A1636C:p.K546Q; NM_181500:exon18:c.A1630C:p.K544Q	1	.	.	.	.	.	.	.	.	.	.	.	.	.	.	0.479	.	.	.	.	.	.	.	.	.	.	.
EZH2	chr7:148543670	.	A>ACTGCTTGGCC	frameshift	insertion	p.R46fs	5	5		.	.	.	NM_001203247:exon3:c.137_138insGGCCAAGCAG:p.R46fs; NM_001203248:exon3:c.137_138insGGCCAAGCAG:p.R46fs; NM_001203249:exon3:c.137_138insGGCCAAGCAG:p.R46fs; NM_004456:exon3:c.137_138insGGCCAAGCAG:p.R46fs; NM_152998:exon3:c.137_138insGGCCAAGCAG:p.R46fs	1	.	.	.	.	.	.	.	.	.	.	.	.	.	.	.	.	.	.	.	.	.	.	.	.	.	0.457
WT1	chr11:32413566	rs121907900	G>A	nonsynonymous	SNV	p.R445W	7	5	nul	5.125	.	.	NM_000378:exon8:c.C1333T:p.R445W; NM_001198552:exon8:c.C697T:p.R233W; NM_001198551:exon9:c.C748T:p.R250W; NM_024424:exon9:c.C1384T:p.R462W; NM_024426:exon9:c.C1384T:p.R462W	1	.	.	.	.	.	.	.	0.472	.	.	.	.	.	.	.	.	.	.	.	.	.	.	.	.	.	.
WT1	chr11:32413578	rs121907909	G>A	stopgain	SNV	p.R441X	7	5	1	4.646	.	.	NM_000378:exon8:c.C1321T:p.R441X; NM_001198552:exon8:c.C685T:p.R229X; NM_001198551:exon9:c.C736T:p.R246X; NM_024424:exon9:c.C1372T:p.R458X; NM_024426:exon9:c.C1372T:p.R458X	1	.	.	.	.	.	.	.	.	.	.	.	.	.	.	.	.	0.81	.	.	.	.	.	.	.	.	.
WT1	chr11:32417915	.	T>TACAAG	frameshift	insertion	p.V362fs	7	5	nul	.	.	.	NM_000378:exon6:c.1085_1086insCTTGT:p.V362fs; NM_001198552:exon6:c.449_450insCTTGT:p.V150fs; NM_001198551:exon7:c.500_501insCTTGT:p.V167fs; NM_024424:exon7:c.1136_1137insCTTGT:p.V379fs; NM_024426:exon7:c.1136_1137insCTTGT:p.V379fs	1	.	.	.	.	.	.	.	.	.	.	.	.	0.404	.	.	.	.	.	.	.	.	.	.	.	.	.
KRAS	chr12:25398282	rs121913535	C>A	nonsynonymous	SNV	p.G13C	4	2	.	7.892	Pathogenic; Pathogenic; Pathogenic; Pathogenic; Pathogenic; Pathogenic; Pathogenic; Pathogenic; Pathogenic; Pathogenic	RAS-associated_autoimmune_leukoproliferative_disorder; Non-small_cell_lung_cancer; Colorectal_Neoplasms; Pilocytic_astrocytoma; Non-small_cell_lung_cancer; Colorectal_Neoplasms; Neoplasm_of_the_thyroid_gland; Colorectal_Neoplasms; Non-small_cell_lung_cancer; Neoplasm_of_the_thyroid_gland	NM_004985:exon2:c.G37T:p.G13C; NM_033360:exon2:c.G37T:p.G13C	1	.	.	.	.	.	.	.	.	.	.	.	0.498	.	.	.	.	.	.	.	.	.	.	.	.	.	.
KRAS	chr12:25398284	rs121913529	C>T	nonsynonymous	SNV	p.G12D	4	2	.	7.892	Pathogenic; Pathogenic; Pathogenic; other; Pathogenic; Pathogenic; Pathogenic; Pathogenic; Likely pathogenic; Pathogenic; not provided; Pathogenic; Likely pathogenic; Pathogenic; Pathogenic; Pathogenic; Pathogenic; Pathogenic; Pathogenic; Pathogenic; Pathogenic; Pathogenic; Pathogenic; Pathogenic; Likely pathogenic; Pathogenic; Likely pathogenic; Pathogenic; Pathogenic	Juvenile_myelomonocytic_leukemia; Carcinoma_of_pancreas; Nevus_sebaceous; Non-small_cell_lung_cancer; not_provided; Neoplasm_of_the_thyroid_gland; Ovarian_Neoplasms; Colorectal_Neoplasms; Acute_myeloid_leukemia; Non-small_cell_lung_cancer; Adenocarcinoma_of_lung; Colorectal_Neoplasms; Gastrointestinal_stromal_tumor; Ovarian_Neoplasms; Carcinoma_of_pancreas; Neoplasm_of_stomach; Epidermal_nevus; N…	NM_004985:exon2:c.G35A:p.G12D; NM_033360:exon2:c.G35A:p.G12D	1	.	.	.	.	.	.	.	.	.	.	.	.	.	.	.	.	.	.	.	0.369	.	.	.	.	.	.
FLT3	chr13:28592642	rs121913488	C>G	nonsynonymous	SNV	p.D835H	1	1	.	7.905	Pathogenic; Pathogenic; Pathogenic; Pathogenic	Acute_myeloid_leukemia; Acute_lymphoid_leukemia; Acute_myeloid_leukemia; Acute_myeloid_leukemia	NM_004119:exon20:c.G2503C:p.D835H	1	.	0.439	.	.	.	.	.	.	.	.	.	.	.	.	.	.	.	.	.	.	.	.	.	.	.	.
TP53	chr17:7578393	rs876660821	A>T	nonsynonymous	SNV	p.H47Q	15	15	.	-0.556	Likely pathogenic; Likely pathogenic; Likely pathogenic; Likely pathogenic; Likely pathogenic; Likely pathogenic; Likely pathogenic; Likely pathogenic; Likely pathogenic; Likely pathogenic; Likely pathogenic; Likely pathogenic; Likely pathogenic; Likely pathogenic; Likely pathogenic; Likely pathogenic; Likely pathogenic; Likely pathogenic; Likely pathogenic; Likely benign; Likely benign; Pathogen…	Acute_myeloid_leukemia; Squamous_cell_carcinoma_of_the_skin; Carcinoma_of_gallbladder; Squamous_cell_carcinoma_of_lung; Malignant_melanoma_of_skin; Neoplasm_of_brain; Adenocarcinoma_of_stomach; Glioblastoma; Malignant_neoplasm_of_body_of_uterus; Small_cell_lung_cancer; Adenocarcinoma_of_lung; Pancreatic_adenocarcinoma; Squamous_cell_carcinoma_of_the_head_and_neck; Ovarian_Serous_Cystadenocarcinom…	NM_001126115:exon1:c.T141A:p.H47Q; NM_001126116:exon1:c.T141A:p.H47Q; NM_001126117:exon1:c.T141A:p.H47Q; NM_001276697:exon1:c.T60A:p.H20Q; NM_001276698:exon1:c.T60A:p.H20Q; NM_001276699:exon1:c.T60A:p.H20Q; NM_001126118:exon4:c.T420A:p.H140Q; NM_000546:exon5:c.T537A:p.H179Q; NM_001126112:exon5:c.T537A:p.H179Q; NM_001126113:exon5:c.T537A:p.H179Q; NM_001126114:exon5:c.T537A:p.H179Q; NM_001276695:ex…	1	.	.	.	.	.	.	.	.	0.57	.	.	.	.	.	.	.	.	.	.	.	.	.	.	.	.	.
ASXL1	chr20:31022938	rs141610022	C>A	nonsynonymous	SNV	p.P808H	3	1	2	0.069	.	.	NM_015338:exon12:c.C2423A:p.P808H	1	.	.	.	0.484	.	.	.	.	.	.	.	.	.	.	.	.	.	.	.	.	.	.	.	.	.	.
BCOR	chrX:39913215	rs776885458	T>C	nonsynonymous	SNV	p.S1582G	6	4	nul	3.073	.	.	NM_001123384:exon13:c.A4744G:p.S1582G; NM_001123383:exon14:c.A4798G:p.S1600G; NM_001123385:exon14:c.A4900G:p.S1634G; NM_017745:exon14:c.A4798G:p.S1600G	1	.	.	.	.	.	.	.	.	.	.	.	.	.	.	.	.	.	.	.	.	.	.	.	.	.	0.513
BCORL1	chrX:129156904	rs776360677	C>T	nonsynonymous	SNV	p.R1214C	2	2	1	3.368	.	.	NM_001184772:exon5:c.C3640T:p.R1214C; NM_021946:exon5:c.C3640T:p.R1214C	1	.	.	.	.	.	.	.	.	.	.	.	.	.	.	.	.	.	.	.	.	.	0.496	.	.	.	.
PHF6	chrX:133527983	.	G>A	splicing	SNV	c.418+1	3	3	1	5.417	.	.	NM_032335:exon5:c.418+1G>A; NM_032458:exon5:c.418+1G>A; NM_001015877:exon5:c.418+1G>A	1	.	.	.	.	.	.	.	.	.	.	.	.	.	.	.	.	.	.	.	0.774	.	.	.	.	.	.
											No. of germline mutations in each Case				1	3	1	1	0	0	0	1	1	1	2	1	1	0	1	0	2	1	0	2	0	1	0	0	0	2
